# Supplementary material for: Transcriptomic and Epigenetic Profiling of the Lung of Influenza-Infected Pigs: A Comparison of Different Birth Weight and Susceptibility Groups
Source: PLoS One. 2015 Sep 22;10(9):e0138653. doi: 10.1371/journal.pone.0138653 (PMC4578952; doi:10.1371/journal.pone.0138653)
Supplement: S3 Appendix — (XLSX) [file pone.0138653.s003.xlsx]

## Sheet: LBW
NAME	MSigDB Set	SIZE	Enrichment Score	Normalized Enrichment Score	Nominal P value	FDR q-value
DAIRKEE_CANCER_PRONE_RESPONSE_BPA	C2	32	0.647105	1.94032	0	0.545286
CHEMELLO_SOLEUS_VS_EDL_MYOFIBERS_UP	C2	24	0.65586	1.93745	0	0.284031
BIOCARTA_G2_PATHWAY	C2	19	0.668842	1.86553	0.00380952	0.525849
PARK_HSC_AND_MULTIPOTENT_PROGENITORS	C2	28	0.51125	1.73377	0.00209644	1
WHITFIELD_CELL_CYCLE_LITERATURE	C2	28	0.707522	1.70183	0.00785855	1
RIZKI_TUMOR_INVASIVENESS_2D_DN	C2	36	0.463335	1.70128	0.00204082	1
SHIPP_DLBCL_VS_FOLLICULAR_LYMPHOMA_DN	C2	30	0.550504	1.69539	0.00793651	1
MARKEY_RB1_ACUTE_LOF_DN	C2	144	0.485121	1.67354	0.0059761	0.898962
BROWNE_HCMV_INFECTION_20HR_UP	C2	135	0.365496	1.60745	0.0019802	0.703085
RESPONSE_TO_HORMONE_STIMULUS	C5	22	0.586291	1.88256	0	0.342358
CELLULAR_RESPONSE_TO_STIMULUS	C5	15	0.725738	1.84945	0	0.266225
DNA_INTEGRITY_CHECKPOINT	C5	15	0.6717	1.78706	0.00596422	0.383069
REPRODUCTIVE_PROCESS	C5	93	0.351014	1.55521	0.00598802	0.52697
REPRODUCTION	C5	140	0.32519	1.51544	0.00828157	0.537708
GSE22886_NAIVE_CD4_TCELL_VS_NKCELL_UP	C7	102	0.490264	1.80053	0	0.789923
GSE24634_NAIVE_CD4_TCELL_VS_DAY5_IL4_CONV_TREG_UP	C7	102	0.40345	1.69342	0.0019685	1
GSE1448_CTRL_VS_ANTI_VALPHA2_DP_THYMOCYTE_UP	C7	96	0.417981	1.68129	0.00790514	1
GSE27786_LSK_VS_NKTCELL_DN	C7	96	0.377307	1.64688	0	0.89652
GSE22886_NAIVE_CD8_TCELL_VS_NKCELL_UP	C7	102	0.39678	1.63766	0.00401606	0.818039
GSE7852_TREG_VS_TCONV_FAT_DN	C7	97	0.401315	1.59517	0.00963391	1
GSE17721_LPS_VS_CPG_0.5H_BMDM_UP	C7	98	0.371089	1.54231	0.00589391	1
GSE360_DC_VS_MAC_L_MAJOR_UP	C7	106	0.336686	1.52689	0.00595238	1
GSE29618_PRE_VS_DAY7_FLU_VACCINE_MDC_DN	C7	105	0.313795	1.43749	0.00764818	1
GSE29618_PRE_VS_DAY7_POST_TIV_FLU_VACCINE_MDC_DN	C7	95	0.314773	1.39383	0.00992064	0.915695

## Sheet: HBW 
NAME	MSigDB Set	SIZE	Enrichment Score	Normalized Enrichment Score	Nominal P value	FDR q-value
ZHENG_IL22_SIGNALING_UP	C2	30	-0.686572	-2.03165	0	0.0951133
HAN_JNK_SINGALING_DN	C2	26	-0.621385	-1.96033	0	0.174036
KAMIKUBO_MYELOID_CEBPA_NETWORK	C2	19	-0.675141	-1.93247	0.00201207	0.184593
TSUNODA_CISPLATIN_RESISTANCE_DN	C2	37	-0.568045	-1.89801	0	0.246603
KEGG_SPHINGOLIPID_METABOLISM	C2	19	-0.660652	-1.87794	0	0.263835
KEGG_LYSOSOME	C2	66	-0.532935	-1.85836	0.006	0.288521
REACTOME_SPHINGOLIPID_METABOLISM	C2	34	-0.576967	-1.85214	0	0.27204
APPEL_IMATINIB_RESPONSE	C2	25	-0.674203	-1.8386	0.00798403	0.283341
LIANG_SILENCED_BY_METHYLATION_UP	C2	15	-0.707293	-1.83333	0	0.269567
VALK_AML_CLUSTER_5	C2	17	-0.715814	-1.82986	0.00639659	0.25342
HALMOS_CEBPA_TARGETS_UP	C2	36	-0.596643	-1.7874	0	0.389656
LIU_SMARCA4_TARGETS	C2	29	-0.564142	-1.78095	0.00798403	0.384309
FOSTER_TOLERANT_MACROPHAGE_UP	C2	93	-0.422917	-1.76456	0	0.401407
LIM_MAMMARY_STEM_CELL_DN	C2	209	-0.41039	-1.76154	0.00399202	0.388265
CHARAFE_BREAST_CANCER_BASAL_VS_MESENCHYMAL_UP	C2	59	-0.486665	-1.72979	0.00972763	0.394918
NIKOLSKY_BREAST_CANCER_8P12_P11_AMPLICON	C2	25	-0.53405	-1.72413	0.00980392	0.401517
PEPTIDYL_TYROSINE_MODIFICATION	C5	20	-0.719574	-2.0899	0	0.00829809
PEPTIDYL_TYROSINE_PHOSPHORYLATION	C5	18	-0.682095	-1.95594	0.00377358	0.0448338
GSE22886_NAIVE_BCELL_VS_MONOCYTE_DN	C7	110	-0.523059	-1.90145	0.00608519	0.142774
GSE22886_NAIVE_CD4_TCELL_VS_DC_DN	C7	113	-0.500031	-1.84904	0	0.167162
GSE22886_NAIVE_CD8_TCELL_VS_DC_DN	C7	122	-0.453969	-1.74892	0.00198807	0.417855
GSE20715_0H_VS_24H_OZONE_LUNG_DN	C7	111	-0.440505	-1.69406	0.00974659	0.339095
GSE36392_TYPE_2_MYELOID_VS_MAC_IL25_TREATED_LUNG_UP	C7	87	-0.359102	-1.57623	0.00598802	0.434219
GSE6269_E_COLI_VS_STREP_PNEUMO_INF_PBMC_DN	C7	97	-0.385686	-1.57166	0.00811359	0.430985

## Sheet: SUS
NAME	MSigDB Set	SIZE	Enrichment Score	Normalized Enrichment Score	Nominal P value	FDR q-value
HALLMARK_INTERFERON_GAMMA_RESPONSE	C1	127	0.59421	2.61709	0	0
HALLMARK_INFLAMMATORY_RESPONSE	C1	131	0.549344	2.43429	0	0
HALLMARK_INTERFERON_ALPHA_RESPONSE	C1	59	0.621096	2.41571	0	0
HALLMARK_TNFA_SIGNALING_VIA_NFKB	C1	128	0.529135	2.34244	0	0
HALLMARK_CHOLESTEROL_HOMEOSTASIS	C1	47	0.58147	2.19397	0	0
HALLMARK_IL6_JAK_STAT3_SIGNALING	C1	57	0.535289	2.04664	0	0.000337882
HALLMARK_MTORC1_SIGNALING	C1	138	0.438708	1.97903	0	0.000760675
HALLMARK_UNFOLDED_PROTEIN_RESPONSE	C1	64	0.465317	1.82935	0	0.00207411
HALLMARK_COMPLEMENT	C1	130	0.391714	1.75174	0	0.00458468
HALLMARK_ESTROGEN_RESPONSE_EARLY	C1	120	0.388863	1.69795	0.0016	0.00716379
HALLMARK_P53_PATHWAY	C1	133	0.376483	1.6848	0.00508475	0.00724274
HALLMARK_APOPTOSIS	C1	120	0.37587	1.66392	0	0.00814902
HALLMARK_MYC_TARGETS_V2	C1	32	0.476695	1.63214	0.00907441	0.010145
HALLMARK_UV_RESPONSE_UP	C1	95	0.359627	1.52436	0.00675676	0.0256114
SANA_TNF_SIGNALING_UP	C2	59	0.703222	2.74604	0	0
HECKER_IFNB1_TARGETS	C2	54	0.671612	2.5698	0	0
ALTEMEIER_RESPONSE_TO_LPS_WITH_MECHANICAL_VENTILATION	C2	80	0.601413	2.45771	0	0
BENNETT_SYSTEMIC_LUPUS_ERYTHEMATOSUS	C2	18	0.813275	2.43296	0	0
UROSEVIC_RESPONSE_TO_IMIQUIMOD	C2	16	0.850177	2.40774	0	0
SANA_RESPONSE_TO_IFNG_UP	C2	44	0.659044	2.37607	0	0
DAUER_STAT3_TARGETS_DN	C2	30	0.697475	2.35568	0	0.000147047
GAURNIER_PSMD4_TARGETS	C2	39	0.665461	2.34177	0	0.000128666
ZUCCHI_METASTASIS_DN	C2	24	0.733785	2.34162	0	0.00011437
WORSCHECH_TUMOR_EVASION_AND_TOLEROGENICITY_UP	C2	25	0.734433	2.32758	0	0.000102933
HAHTOLA_MYCOSIS_FUNGOIDES_CD4_UP	C2	41	0.632873	2.3218	0	9.35753e-05
REACTOME_INTERFERON_ALPHA_BETA_SIGNALING	C2	40	0.652163	2.31213	0	8.57774e-05
GARGALOVIC_RESPONSE_TO_OXIDIZED_PHOSPHOLIPIDS_BLUE_UP	C2	68	0.57255	2.27692	0	7.91791e-05
BROWNE_INTERFERON_RESPONSIVE_GENES	C2	43	0.625634	2.26711	0	0.000219979
ICHIBA_GRAFT_VERSUS_HOST_DISEASE_D7_UP	C2	72	0.551162	2.24308	0	0.000205314
LIANG_SILENCED_BY_METHYLATION_2	C2	32	0.660349	2.24274	0	0.000192481
SEKI_INFLAMMATORY_RESPONSE_LPS_UP	C2	47	0.604796	2.21709	0	0.000300089
EINAV_INTERFERON_SIGNATURE_IN_CANCER	C2	17	0.763741	2.21512	0	0.000283418
KEGG_NOD_LIKE_RECEPTOR_SIGNALING_PATHWAY	C2	42	0.605202	2.21124	0	0.000322768
REACTOME_INTERFERON_GAMMA_SIGNALING	C2	36	0.618023	2.20407	0	0.000359284
DER_IFN_ALPHA_RESPONSE_UP	C2	53	0.592222	2.19865	0	0.000342175
SARTIPY_NORMAL_AT_INSULIN_RESISTANCE_UP	C2	19	0.735859	2.18121	0	0.000510715
DELACROIX_RAR_TARGETS_UP	C2	26	0.662929	2.17686	0	0.000712387
RADAEVA_RESPONSE_TO_IFNA1_UP	C2	37	0.621042	2.16612	0	0.000853863
PHONG_TNF_RESPONSE_VIA_P38_PARTIAL	C2	100	0.496043	2.15563	0	0.000942233
WAMUNYOKOLI_OVARIAN_CANCER_GRADES_1_2_UP	C2	83	0.51559	2.14663	0	0.00106276
DAUER_STAT3_TARGETS_UP	C2	35	0.606752	2.13999	0	0.0010988
GHANDHI_DIRECT_IRRADIATION_UP	C2	57	0.552248	2.13667	0	0.00117026
KIM_RESPONSE_TO_TSA_AND_DECITABINE_UP	C2	59	0.54565	2.13572	0	0.00116579
DAZARD_UV_RESPONSE_CLUSTER_G2	C2	18	0.719914	2.13196	0	0.00119532
MOSERLE_IFNA_RESPONSE	C2	22	0.681019	2.13029	0	0.00115676
JI_RESPONSE_TO_FSH_UP	C2	38	0.602113	2.12887	0	0.00112061
ZHANG_RESPONSE_TO_IKK_INHIBITOR_AND_TNF_UP	C2	139	0.476135	2.12526	0	0.00114904
BOWIE_RESPONSE_TO_TAMOXIFEN	C2	15	0.739565	2.11166	0	0.00132286
STAMBOLSKY_TARGETS_OF_MUTATED_TP53_DN	C2	28	0.633059	2.10152	0	0.00151807
PHONG_TNF_TARGETS_UP	C2	44	0.573527	2.09384	0	0.00170368
BURTON_ADIPOGENESIS_PEAK_AT_2HR	C2	32	0.614377	2.0881	0	0.0018241
ZHANG_INTERFERON_RESPONSE	C2	17	0.734365	2.08648	0	0.00185777
REACTOME_INTERFERON_SIGNALING	C2	97	0.486051	2.08504	0	0.00186199
HOFMANN_MYELODYSPLASTIC_SYNDROM_LOW_RISK_DN	C2	16	0.745317	2.08454	0	0.00181544
CHEN_LUNG_CANCER_SURVIVAL	C2	19	0.693147	2.08188	0	0.00189542
BOSCO_INTERFERON_INDUCED_ANTIVIRAL_MODULE	C2	42	0.581801	2.07921	0	0.00192245
HINATA_NFKB_TARGETS_KERATINOCYTE_UP	C2	68	0.517543	2.07732	0	0.00197188
VERHAAK_AML_WITH_NPM1_MUTATED_UP	C2	111	0.472612	2.07296	0	0.0021595
ZHU_CMV_24_HR_UP	C2	56	0.533073	2.06602	0	0.0025455
YAN_ESCAPE_FROM_ANOIKIS	C2	17	0.707267	2.06034	0	0.00275669
BROWNE_HCMV_INFECTION_6HR_UP	C2	42	0.566733	2.05973	0	0.00271952
GHANDHI_BYSTANDER_IRRADIATION_UP	C2	48	0.554145	2.05906	0	0.00268408
ZHU_CMV_ALL_UP	C2	73	0.511796	2.05765	0	0.00267081
GALINDO_IMMUNE_RESPONSE_TO_ENTEROTOXIN	C2	49	0.551627	2.04099	0	0.00355692
BILD_HRAS_ONCOGENIC_SIGNATURE	C2	151	0.449176	2.03743	0	0.00358678
GU_PDEF_TARGETS_DN	C2	24	0.641988	2.03303	0.003663	0.00387098
NAGASHIMA_NRG1_SIGNALING_UP	C2	108	0.473381	2.02603	0	0.00424394
REACTOME_CHEMOKINE_RECEPTORS_BIND_CHEMOKINES	C2	36	0.572201	2.02527	0	0.00422186
ZWANG_CLASS_3_TRANSIENTLY_INDUCED_BY_EGF	C2	142	0.451222	2.0205	0	0.00440695
ONDER_CDH1_TARGETS_2_DN	C2	253	0.418704	2.01243	0	0.00467538
LINDSTEDT_DENDRITIC_CELL_MATURATION_A	C2	49	0.546526	2.01218	0	0.00461137
PELLICCIOTTA_HDAC_IN_ANTIGEN_PRESENTATION_UP	C2	32	0.593842	2.00558	0	0.0049352
BROWNE_HCMV_INFECTION_24HR_UP	C2	83	0.487659	2.00553	0	0.00485155
GRAHAM_CML_QUIESCENT_VS_NORMAL_DIVIDING_UP	C2	36	0.571788	2.0016	0	0.00514724
BROWN_MYELOID_CELL_DEVELOPMENT_UP	C2	90	0.481705	1.99912	0	0.00521381
AMIT_EGF_RESPONSE_480_HELA	C2	87	0.478582	1.99565	0	0.00536074
KERLEY_RESPONSE_TO_CISPLATIN_UP	C2	28	0.607535	1.99437	0	0.00534001
LABBE_TARGETS_OF_TGFB1_AND_WNT3A_DN	C2	70	0.496809	1.99031	0	0.00562264
NEMETH_INFLAMMATORY_RESPONSE_LPS_UP	C2	59	0.518953	1.98958	0	0.00563113
KEGG_CYTOSOLIC_DNA_SENSING_PATHWAY	C2	33	0.576896	1.98857	0	0.0056856
PEDERSEN_METASTASIS_BY_ERBB2_ISOFORM_1	C2	25	0.621406	1.98694	0	0.00573667
KUROZUMI_RESPONSE_TO_ONCOCYTIC_VIRUS	C2	32	0.595152	1.98633	0	0.00571204
COULOUARN_TEMPORAL_TGFB1_SIGNATURE_DN	C2	75	0.49189	1.98506	0	0.00568849
KEGG_TOLL_LIKE_RECEPTOR_SIGNALING_PATHWAY	C2	78	0.483997	1.9848	0	0.00562199
AIGNER_ZEB1_TARGETS	C2	21	0.655734	1.98339	0	0.00562925
ZHANG_ANTIVIRAL_RESPONSE_TO_RIBAVIRIN_UP	C2	18	0.665108	1.96703	0	0.00660087
KIM_WT1_TARGETS_UP	C2	136	0.439383	1.9655	0	0.00672039
ZHU_CMV_8_HR_UP	C2	31	0.58536	1.96055	0	0.00691859
ZHONG_SECRETOME_OF_LUNG_CANCER_AND_MACROPHAGE	C2	53	0.524709	1.96037	0	0.00682634
VALK_AML_CLUSTER_5	C2	17	0.674753	1.95917	0	0.00687119
REACTOME_PERK_REGULATED_GENE_EXPRESSION	C2	15	0.69048	1.95231	0.00186916	0.00747004
HINATA_NFKB_TARGETS_FIBROBLAST_UP	C2	54	0.511231	1.95199	0	0.00740036
BOWIE_RESPONSE_TO_EXTRACELLULAR_MATRIX	C2	16	0.694078	1.95155	0	0.00737078
HORTON_SREBF_TARGETS	C2	15	0.688273	1.94554	0	0.00795312
ONDER_CDH1_TARGETS_3_DN	C2	27	0.603916	1.9454	0	0.00785493
SHEPARD_CRUSH_AND_BURN_MUTANT_UP	C2	110	0.447599	1.94093	0	0.00823087
SCHOEN_NFKB_SIGNALING	C2	25	0.604258	1.94058	0	0.00816869
BIOCARTA_IL1R_PATHWAY	C2	28	0.59357	1.93895	0	0.00819316
GRAHAM_CML_QUIESCENT_VS_CML_DIVIDING_UP	C2	16	0.663431	1.93656	0	0.00847992
BOSCO_EPITHELIAL_DIFFERENTIATION_MODULE	C2	25	0.605535	1.93171	0	0.00895145
MANTOVANI_NFKB_TARGETS_UP	C2	31	0.57331	1.92808	0	0.00915417
LEI_MYB_TARGETS	C2	196	0.406798	1.91967	0	0.0101721
SMITH_TERT_TARGETS_UP	C2	91	0.449979	1.90898	0	0.0116327
NAKAYAMA_SOFT_TISSUE_TUMORS_PCA1_UP	C2	44	0.526056	1.90807	0	0.01164
BURTON_ADIPOGENESIS_5	C2	71	0.475888	1.90164	0	0.012366
BURTON_ADIPOGENESIS_1	C2	24	0.58802	1.89774	0	0.0127298
TRACEY_RESISTANCE_TO_IFNA2_DN	C2	17	0.657102	1.89752	0	0.012615
REACTOME_METAL_ION_SLC_TRANSPORTERS	C2	19	0.648578	1.89627	0.00189753	0.0127296
KEGG_PROTEASOME	C2	25	0.58344	1.89246	0	0.0131638
DER_IFN_BETA_RESPONSE_UP	C2	69	0.470256	1.8893	0	0.0135801
MISSIAGLIA_REGULATED_BY_METHYLATION_UP	C2	79	0.459452	1.8889	0	0.013482
PENG_LEUCINE_DEPRIVATION_DN	C2	106	0.441211	1.88794	0	0.0135215
DORSEY_GAB2_TARGETS	C2	20	0.618578	1.88725	0.0037594	0.0135188
REACTOME_ER_PHAGOSOME_PATHWAY	C2	35	0.533643	1.88471	0.00175131	0.013824
ZHANG_GATA6_TARGETS_DN	C2	38	0.530764	1.88409	0.00180505	0.0137685
REACTOME_CYTOKINE_SIGNALING_IN_IMMUNE_SYSTEM	C2	178	0.405307	1.88369	0	0.0136635
AMIT_SERUM_RESPONSE_40_MCF10A	C2	22	0.610512	1.87958	0.00176367	0.0141914
YAO_TEMPORAL_RESPONSE_TO_PROGESTERONE_CLUSTER_11	C2	59	0.484941	1.87956	0	0.0140549
TIAN_TNF_SIGNALING_VIA_NFKB	C2	19	0.627791	1.87085	0.00177936	0.0155285
REACTOME_REGULATION_OF_ORNITHINE_DECARBOXYLASE_ODC	C2	31	0.559149	1.87074	0	0.0154109
WORSCHECH_TUMOR_REJECTION_UP	C2	35	0.540273	1.87068	0	0.015286
CHUANG_OXIDATIVE_STRESS_RESPONSE_UP	C2	19	0.617334	1.87041	0.00373832	0.0151635
DER_IFN_GAMMA_RESPONSE_UP	C2	47	0.506387	1.86938	0	0.0151087
AMIT_EGF_RESPONSE_120_MCF10A	C2	25	0.572027	1.86812	0	0.0151375
SAGIV_CD24_TARGETS_DN	C2	20	0.618717	1.86733	0.00511945	0.0152048
TSUNODA_CISPLATIN_RESISTANCE_DN	C2	37	0.530386	1.86643	0	0.0152599
WANG_ADIPOGENIC_GENES_REPRESSED_BY_SIRT1	C2	18	0.631386	1.86569	0	0.0152426
DEBIASI_APOPTOSIS_BY_REOVIRUS_INFECTION_UP	C2	189	0.404728	1.86477	0	0.015315
RASHI_RESPONSE_TO_IONIZING_RADIATION_2	C2	76	0.456528	1.86	0	0.0160432
PAPASPYRIDONOS_UNSTABLE_ATEROSCLEROTIC_PLAQUE_UP	C2	33	0.542595	1.85458	0.00177936	0.0168193
SHIPP_DLBCL_VS_FOLLICULAR_LYMPHOMA_UP	C2	30	0.546367	1.85336	0.00179533	0.0169198
AMIT_EGF_RESPONSE_120_HELA	C2	31	0.551099	1.85216	0	0.0170188
GERHOLD_ADIPOGENESIS_DN	C2	43	0.504914	1.8485	0.00182482	0.0175636
ROSS_AML_WITH_CBFB_MYH11_FUSION	C2	36	0.527208	1.84769	0	0.0175191
LIANG_SILENCED_BY_METHYLATION_UP	C2	15	0.661729	1.84739	0	0.017425
LI_LUNG_CANCER	C2	26	0.562911	1.8377	0.00695652	0.0192905
BURTON_ADIPOGENESIS_PEAK_AT_8HR	C2	29	0.554475	1.83091	0	0.02063
KHETCHOUMIAN_TRIM24_TARGETS_UP	C2	33	0.530581	1.82883	0.00176367	0.0209661
WAMUNYOKOLI_OVARIAN_CANCER_LMP_UP	C2	119	0.419658	1.82871	0	0.0208064
HALMOS_CEBPA_TARGETS_UP	C2	36	0.520015	1.82701	0.00347826	0.0210292
DAZARD_UV_RESPONSE_CLUSTER_G1	C2	48	0.499012	1.82683	0	0.0209119
UZONYI_RESPONSE_TO_LEUKOTRIENE_AND_THROMBIN	C2	25	0.577547	1.82608	0.00362976	0.0209731
BURTON_ADIPOGENESIS_2	C2	49	0.484814	1.82512	0	0.0210968
GROSS_HYPOXIA_VIA_ELK3_DN	C2	93	0.435485	1.824	0	0.0212015
JISON_SICKLE_CELL_DISEASE_UP	C2	106	0.417841	1.81808	0	0.0226073
CONCANNON_APOPTOSIS_BY_EPOXOMICIN_UP	C2	136	0.408676	1.81719	0	0.0226462
FOSTER_TOLERANT_MACROPHAGE_DN	C2	259	0.377279	1.81673	0	0.0226289
KOHOUTEK_CCNT1_TARGETS	C2	27	0.54877	1.81474	0	0.0229465
MILI_PSEUDOPODIA_HAPTOTAXIS_DN	C2	369	0.358356	1.81346	0	0.0230948
HARRIS_HYPOXIA	C2	53	0.479754	1.81171	0.00173913	0.0234198
PID_ERBB2_ERBB3_PATHWAY	C2	34	0.52042	1.81026	0.0016835	0.0236066
HUMMERICH_SKIN_CANCER_PROGRESSION_UP	C2	57	0.468286	1.80961	0.00356506	0.0235909
HENDRICKS_SMARCA4_TARGETS_UP	C2	33	0.525473	1.80934	0.00182482	0.0234505
KOKKINAKIS_METHIONINE_DEPRIVATION_48HR_UP	C2	95	0.428221	1.80801	0	0.0236469
KRIGE_AMINO_ACID_DEPRIVATION	C2	21	0.590159	1.80647	0.00545455	0.0238543
WINZEN_DEGRADED_VIA_KHSRP	C2	64	0.458886	1.80466	0.00333333	0.0241394
KEGG_RIG_I_LIKE_RECEPTOR_SIGNALING_PATHWAY	C2	45	0.489515	1.80399	0.00180505	0.0241844
CHANGOLKAR_H2AFY_TARGETS_UP	C2	29	0.539936	1.80078	0.00375235	0.0249372
MCLACHLAN_DENTAL_CARIES_UP	C2	151	0.399823	1.80057	0	0.0248498
LENAOUR_DENDRITIC_CELL_MATURATION_DN	C2	80	0.442405	1.7994	0.00162602	0.0249941
FEVR_CTNNB1_TARGETS_UP	C2	389	0.356675	1.79731	0	0.0252482
TSAI_RESPONSE_TO_RADIATION_THERAPY	C2	26	0.56063	1.79667	0.00362319	0.0253325
JACKSON_DNMT1_TARGETS_UP	C2	48	0.49183	1.79635	0.0017452	0.0252999
HELLER_SILENCED_BY_METHYLATION_DN	C2	61	0.456529	1.79536	0	0.0254509
HIRSCH_CELLULAR_TRANSFORMATION_SIGNATURE_UP	C2	132	0.40523	1.788	0	0.0273333
PID_GMCSF_PATHWAY	C2	27	0.54197	1.78676	0.00176991	0.02747
WIERENGA_STAT5A_TARGETS_GROUP2	C2	32	0.528687	1.78584	0.00166945	0.0275721
REACTOME_CROSS_PRESENTATION_OF_SOLUBLE_EXOGENOUS_ANTIGENS_ENDOSOMES	C2	28	0.546515	1.78384	0.00344828	0.0279824
BIOCARTA_IL6_PATHWAY	C2	17	0.618858	1.7825	0.00536673	0.0282177
KOKKINAKIS_METHIONINE_DEPRIVATION_96HR_DN	C2	47	0.479809	1.78094	0.00184502	0.0284951
ONDER_CDH1_TARGETS_1_DN	C2	97	0.418021	1.78085	0	0.028333
DELYS_THYROID_CANCER_UP	C2	262	0.364531	1.78	0	0.0283478
GERY_CEBP_TARGETS	C2	76	0.432614	1.77904	0	0.0283686
REACTOME_IL1_SIGNALING	C2	29	0.530627	1.77381	0.0056926	0.0297155
LIEN_BREAST_CARCINOMA_METAPLASTIC_VS_DUCTAL_UP	C2	56	0.454517	1.77308	0	0.0297837
SHAFFER_IRF4_TARGETS_IN_ACTIVATED_B_LYMPHOCYTE	C2	51	0.469809	1.77255	0.00171527	0.0297319
FOSTER_TOLERANT_MACROPHAGE_UP	C2	93	0.421699	1.77122	0.00164474	0.0299493
PID_INSULIN_GLUCOSE_PATHWAY	C2	18	0.605566	1.77049	0.003663	0.0300467
CORRE_MULTIPLE_MYELOMA_UP	C2	41	0.479506	1.76945	0.00526316	0.0301495
NAGASHIMA_EGF_SIGNALING_UP	C2	36	0.499099	1.76872	0.00552486	0.0302078
TAKAO_RESPONSE_TO_UVB_RADIATION_DN	C2	74	0.442031	1.76848	0.00179211	0.0299209
MCLACHLAN_DENTAL_CARIES_DN	C2	149	0.386631	1.76726	0	0.0301014
PENG_GLUTAMINE_DEPRIVATION_DN	C2	177	0.383642	1.76646	0	0.0302002
MUELLER_COMMON_TARGETS_OF_AML_FUSIONS_DN	C2	17	0.60575	1.76572	0.0093985	0.0302022
LI_INDUCED_T_TO_NATURAL_KILLER_UP	C2	156	0.382048	1.76426	0	0.030364
BIOCARTA_P38MAPK_PATHWAY	C2	27	0.536477	1.76261	0.00383877	0.030615
KIM_LRRC3B_TARGETS	C2	21	0.570189	1.76188	0.00363636	0.0307148
PID_IFNG_PATHWAY	C2	34	0.504385	1.76163	0.00492611	0.0306621
FULCHER_INFLAMMATORY_RESPONSE_LECTIN_VS_LPS_DN	C2	246	0.360774	1.76082	0	0.0307192
ST_GAQ_PATHWAY	C2	15	0.615642	1.7589	0.00897666	0.0310866
TAKEDA_TARGETS_OF_NUP98_HOXA9_FUSION_8D_UP	C2	89	0.418139	1.7556	0.00169779	0.0318653
LIN_APC_TARGETS	C2	34	0.512606	1.75553	0.00181818	0.0317166
MAHAJAN_RESPONSE_TO_IL1A_UP	C2	59	0.455747	1.75089	0	0.03295
ACEVEDO_FGFR1_TARGETS_IN_PROSTATE_CANCER_MODEL_UP	C2	156	0.383905	1.75078	0	0.0328084
WU_CELL_MIGRATION	C2	106	0.409874	1.74976	0.00165289	0.032981
ZHANG_TLX_TARGETS_36HR_UP	C2	118	0.400564	1.7488	0	0.0331737
REACTOME_INNATE_IMMUNE_SYSTEM	C2	156	0.384278	1.74787	0	0.0333482
KANG_GIST_WITH_PDGFRA_UP	C2	31	0.516991	1.74743	0.00189036	0.0332845
BIOCARTA_COMP_PATHWAY	C2	16	0.615304	1.74686	0.00892857	0.0332809
PENG_RAPAMYCIN_RESPONSE_DN	C2	135	0.386964	1.74375	0	0.0338414
SEMENZA_HIF1_TARGETS	C2	29	0.522031	1.7394	0.00353982	0.0352686
DAZARD_RESPONSE_TO_UV_NHEK_UP	C2	140	0.383779	1.73797	0	0.0356088
REACTOME_TRANSPORT_OF_GLUCOSE_AND_OTHER_SUGARS_BILE_SALTS_AND_ORGANIC_ACIDS_METAL_IONS_AND_AMINE_COMPOUNDS	C2	51	0.457401	1.73663	0.00527241	0.0357008
GENTILE_UV_LOW_DOSE_UP	C2	18	0.580333	1.73447	0.00571429	0.0363217
ENK_UV_RESPONSE_KERATINOCYTE_UP	C2	285	0.35356	1.73139	0	0.0371922
BROWNE_HCMV_INFECTION_4HR_UP	C2	35	0.496842	1.7305	0.00530973	0.037289
CASTELLANO_NRAS_TARGETS_UP	C2	42	0.479342	1.72901	0.00182482	0.0375361
SCHUHMACHER_MYC_TARGETS_UP	C2	52	0.456679	1.72888	0.00172117	0.0374242
ZHENG_IL22_SIGNALING_UP	C2	30	0.504873	1.72868	0.00869565	0.0372875
REACTOME_UNFOLDED_PROTEIN_RESPONSE	C2	36	0.492882	1.72685	0.00536673	0.0376981
KLEIN_PRIMARY_EFFUSION_LYMPHOMA_UP	C2	36	0.492477	1.72682	0.00365631	0.0375207
SENESE_HDAC1_TARGETS_UP	C2	264	0.353922	1.72538	0	0.0377646
PID_PI3KCI_AKT_PATHWAY	C2	28	0.528563	1.72393	0.00362319	0.0381516
CUI_TCF21_TARGETS_DN	C2	15	0.621088	1.72355	0.00776699	0.0380992
MARZEC_IL2_SIGNALING_UP	C2	66	0.431618	1.72076	0.00176367	0.0389261
KIM_WT1_TARGETS_8HR_UP	C2	107	0.396565	1.72022	0	0.0389856
HELLER_HDAC_TARGETS_SILENCED_BY_METHYLATION_DN	C2	176	0.367773	1.71644	0	0.0397554
SABATES_COLORECTAL_ADENOMA_UP	C2	58	0.443852	1.71504	0.00518135	0.0400955
BIOCARTA_TGFB_PATHWAY	C2	16	0.586965	1.71448	0.00534759	0.0401373
REACTOME_REGULATION_OF_MRNA_STABILITY_BY_PROTEINS_THAT_BIND_AU_RICH_ELEMENTS	C2	43	0.471646	1.71373	0	0.0402071
YAO_TEMPORAL_RESPONSE_TO_PROGESTERONE_CLUSTER_8	C2	35	0.494825	1.71355	0.00177305	0.0401191
UEDA_CENTRAL_CLOCK	C2	59	0.441219	1.71321	0.00170068	0.040037
GRAESSMANN_RESPONSE_TO_MC_AND_SERUM_DEPRIVATION_UP	C2	126	0.388463	1.71266	0	0.0401029
REACTOME_SIGNALING_BY_WNT	C2	41	0.474355	1.71103	0.00551471	0.0405652
HELLER_HDAC_TARGETS_DN	C2	172	0.374085	1.70883	0.00164474	0.0412545
PELLICCIOTTA_HDAC_IN_ANTIGEN_PRESENTATION_DN	C2	27	0.532034	1.70838	0.00351494	0.0412197
ST_B_CELL_ANTIGEN_RECEPTOR	C2	23	0.543062	1.7067	0.00545455	0.0417113
ACEVEDO_NORMAL_TISSUE_ADJACENT_TO_LIVER_TUMOR_DN	C2	171	0.366905	1.70565	0.00165289	0.0419671
MARKEY_RB1_ACUTE_LOF_UP	C2	132	0.378411	1.70563	0	0.041791
PHONG_TNF_RESPONSE_NOT_VIA_P38	C2	205	0.357874	1.70514	0	0.0417689
CROMER_TUMORIGENESIS_DN	C2	19	0.578057	1.70419	0.00377358	0.0419485
SHEPARD_BMYB_MORPHOLINO_UP	C2	114	0.387495	1.69895	0	0.0438949
WANG_METHYLATED_IN_BREAST_CANCER	C2	21	0.548148	1.69731	0.00884956	0.0443676
GRAESSMANN_APOPTOSIS_BY_SERUM_DEPRIVATION_UP	C2	307	0.344006	1.69724	0	0.0441987
PID_MTOR_4PATHWAY	C2	43	0.473914	1.69708	0	0.0440988
UEDA_PERIFERAL_CLOCK	C2	112	0.385557	1.69663	0	0.0441107
REACTOME_P53_DEPENDENT_G1_DNA_DAMAGE_RESPONSE	C2	34	0.488649	1.69648	0.00344234	0.0439901
SESTO_RESPONSE_TO_UV_C1	C2	45	0.465746	1.69475	0.00179211	0.0444937
REACTOME_CYCLIN_E_ASSOCIATED_EVENTS_DURING_G1_S_TRANSITION_	C2	40	0.47438	1.69426	0.00866551	0.0445177
JECHLINGER_EPITHELIAL_TO_MESENCHYMAL_TRANSITION_UP	C2	49	0.451734	1.68608	0.00720721	0.0477578
SPIRA_SMOKERS_LUNG_CANCER_UP	C2	27	0.51686	1.68315	0.00883392	0.0486033
RICKMAN_METASTASIS_DN	C2	137	0.372214	1.68159	0	0.0491903
BHAT_ESR1_TARGETS_NOT_VIA_AKT1_UP	C2	103	0.392801	1.68123	0.00165563	0.0491336
PID_IL6_7_PATHWAY	C2	36	0.482747	1.68114	0.00881834	0.0489704
BROWNE_HCMV_INFECTION_1HR_UP	C2	41	0.466013	1.68048	0.00851789	0.0490467
SMIRNOV_RESPONSE_TO_IR_2HR_UP	C2	38	0.47508	1.67954	0.00519931	0.0492763
BERTUCCI_MEDULLARY_VS_DUCTAL_BREAST_CANCER_UP	C2	120	0.381923	1.67928	0	0.049161
SMIRNOV_RESPONSE_TO_IR_6HR_UP	C2	94	0.399492	1.67821	0	0.0492789
GUO_TARGETS_OF_IRS1_AND_IRS2	C2	62	0.419263	1.67744	0.00507614	0.049189
CHANG_IMMORTALIZED_BY_HPV31_DN	C2	39	0.474909	1.67576	0.00350263	0.0499453
BASSO_CD40_SIGNALING_UP	C2	56	0.43387	1.67557	0.00177305	0.0498509
KIM_WT1_TARGETS_12HR_UP	C2	106	0.386496	1.67525	0	0.0497939
CROMER_METASTASIS_DN	C2	38	0.466383	1.67495	0.00896057	0.0497332
SMIRNOV_CIRCULATING_ENDOTHELIOCYTES_IN_CANCER_UP	C2	99	0.392232	1.67463	0.0016835	0.0497312
RUTELLA_RESPONSE_TO_HGF_VS_CSF2RB_AND_IL4_UP	C2	248	0.345133	1.67197	0	0.0506736
SATO_SILENCED_BY_METHYLATION_IN_PANCREATIC_CANCER_1	C2	214	0.354816	1.67077	0	0.0508919
REACTOME_DOWNSTREAM_SIGNALING_EVENTS_OF_B_CELL_RECEPTOR_BCR	C2	64	0.425597	1.66614	0.00335008	0.0528528
LIAN_LIPA_TARGETS_3M	C2	41	0.455554	1.66536	0.00886525	0.0528433
HELLER_SILENCED_BY_METHYLATION_UP	C2	149	0.364604	1.66366	0	0.0534131
GRADE_COLON_AND_RECTAL_CANCER_UP	C2	148	0.364454	1.66237	0	0.0537989
GROSS_HYPOXIA_VIA_ELK3_ONLY_UP	C2	26	0.516327	1.66221	0.00896057	0.0536821
MILI_PSEUDOPODIA_CHEMOTAXIS_DN	C2	267	0.341285	1.66048	0	0.054313
ZHANG_TLX_TARGETS_DN	C2	61	0.4177	1.65063	0.00711744	0.0583684
REACTOME_REGULATION_OF_APOPTOSIS	C2	37	0.469769	1.64768	0.00746269	0.0595756
WINTER_HYPOXIA_METAGENE	C2	157	0.359452	1.64697	0	0.0596822
SHAFFER_IRF4_TARGETS_IN_MYELOMA_VS_MATURE_B_LYMPHOCYTE	C2	73	0.415215	1.64626	0	0.0598756
LIM_MAMMARY_STEM_CELL_DN	C2	209	0.345535	1.64209	0	0.0617622
VERHAAK_GLIOBLASTOMA_MESENCHYMAL	C2	131	0.369763	1.63923	0	0.0627676
ZHONG_RESPONSE_TO_AZACITIDINE_AND_TSA_UP	C2	96	0.391396	1.63789	0.00492611	0.0630298
MCBRYAN_PUBERTAL_BREAST_3_4WK_UP	C2	119	0.375643	1.63764	0	0.0629601
LU_EZH2_TARGETS_UP	C2	123	0.375792	1.63605	0	0.0628443
WEI_MYCN_TARGETS_WITH_E_BOX	C2	393	0.320705	1.63521	0	0.0630077
RUTELLA_RESPONSE_TO_HGF_UP	C2	241	0.339448	1.63398	0	0.0633846
CREIGHTON_ENDOCRINE_THERAPY_RESISTANCE_3	C2	408	0.320564	1.63277	0	0.063853
BRUINS_UVC_RESPONSE_VIA_TP53_GROUP_B	C2	277	0.333169	1.63122	0	0.0644375
REACTOME_ACTIVATION_OF_NF_KAPPAB_IN_B_CELLS	C2	42	0.447423	1.62041	0.00847458	0.0685842
WIELAND_UP_BY_HBV_INFECTION	C2	58	0.41982	1.6156	0.00837521	0.0704897
REACTOME_SLC_MEDIATED_TRANSMEMBRANE_TRANSPORT	C2	146	0.356586	1.61432	0.0015625	0.0709482
HUPER_BREAST_BASAL_VS_LUMINAL_UP	C2	31	0.482565	1.61157	0.00729927	0.0722273
BLUM_RESPONSE_TO_SALIRASIB_UP	C2	144	0.356965	1.61151	0.00315956	0.072046
COATES_MACROPHAGE_M1_VS_M2_DN	C2	40	0.450039	1.60973	0.00508475	0.0726464
KEGG_CYTOKINE_CYTOKINE_RECEPTOR_INTERACTION	C2	146	0.350977	1.60895	0	0.0728612
MCBRYAN_PUBERTAL_BREAST_4_5WK_UP	C2	155	0.35212	1.60416	0	0.0749984
ZHONG_SECRETOME_OF_LUNG_CANCER_AND_FIBROBLAST	C2	91	0.382841	1.60284	0.00503356	0.0752465
KEGG_CHEMOKINE_SIGNALING_PATHWAY	C2	112	0.371737	1.5987	0.00159744	0.0767458
JOHNSTONE_PARVB_TARGETS_2_UP	C2	77	0.3974	1.5983	0.00866551	0.0767081
LABBE_TGFB1_TARGETS_UP	C2	61	0.406254	1.59747	0.0069808	0.0770268
KOINUMA_TARGETS_OF_SMAD2_OR_SMAD3	C2	489	0.308962	1.59493	0	0.078178
CHIARADONNA_NEOPLASTIC_TRANSFORMATION_CDC25_UP	C2	83	0.390912	1.59437	0.00340136	0.0782607
REACTOME_TOLL_RECEPTOR_CASCADES	C2	89	0.382908	1.59222	0.003367	0.0793949
RICKMAN_TUMOR_DIFFERENTIATED_WELL_VS_POORLY_DN	C2	192	0.339202	1.59141	0	0.0793875
REACTOME_METABOLISM_OF_AMINO_ACIDS_AND_DERIVATIVES	C2	120	0.36043	1.58566	0	0.0825193
BHAT_ESR1_TARGETS_VIA_AKT1_UP	C2	135	0.349702	1.57314	0	0.0887937
REACTOME_ANTIGEN_PROCESSING_CROSS_PRESENTATION	C2	45	0.429991	1.56678	0.00179211	0.0925294
KARLSSON_TGFB1_TARGETS_UP	C2	73	0.384845	1.56625	0.00834725	0.0926695
KEGG_MAPK_SIGNALING_PATHWAY	C2	153	0.346862	1.55906	0.00623053	0.0972093
TAKEDA_TARGETS_OF_NUP98_HOXA9_FUSION_3D_UP	C2	104	0.357718	1.54862	0.00641026	0.102713
DOANE_RESPONSE_TO_ANDROGEN_UP	C2	95	0.371255	1.54693	0.005	0.103497
SMID_BREAST_CANCER_ERBB2_UP	C2	84	0.368035	1.53771	0.00328407	0.10845
TSAI_RESPONSE_TO_IONIZING_RADIATION	C2	97	0.36472	1.53601	0.00509338	0.109429
COLDREN_GEFITINIB_RESISTANCE_DN	C2	101	0.364313	1.53424	0.00487013	0.110227
WILCOX_RESPONSE_TO_PROGESTERONE_UP	C2	94	0.365279	1.53199	0.00493421	0.110575
KRIGE_RESPONSE_TO_TOSEDOSTAT_24HR_DN	C2	473	0.29615	1.52894	0	0.111095
BERENJENO_TRANSFORMED_BY_RHOA_UP	C2	302	0.307905	1.52847	0.00142653	0.111189
REACTOME_SIGNALING_BY_ILS	C2	79	0.372946	1.52605	0.00700525	0.112698
KRIGE_RESPONSE_TO_TOSEDOSTAT_6HR_DN	C2	417	0.298828	1.52586	0	0.112254
MONNIER_POSTRADIATION_TUMOR_ESCAPE_UP	C2	242	0.312339	1.52032	0.00147275	0.115134
YANG_BCL3_TARGETS_UP	C2	213	0.315018	1.50623	0	0.125343
SWEET_LUNG_CANCER_KRAS_UP	C2	288	0.305514	1.50392	0.00146199	0.125327
DANG_REGULATED_BY_MYC_DN	C2	175	0.326249	1.50353	0	0.125343
GAL_LEUKEMIC_STEM_CELL_DN	C2	126	0.341949	1.5005	0.00782473	0.126971
PLASARI_TGFB1_TARGETS_10HR_UP	C2	113	0.346112	1.4994	0.00322581	0.127363
JOHNSTONE_PARVB_TARGETS_3_UP	C2	247	0.30966	1.49818	0.00157233	0.127876
VECCHI_GASTRIC_CANCER_EARLY_UP	C2	234	0.310586	1.49348	0.00149701	0.1308
ENK_UV_RESPONSE_EPIDERMIS_UP	C2	148	0.332789	1.49157	0.00490196	0.132044
HORIUCHI_WTAP_TARGETS_UP	C2	164	0.322894	1.4883	0.00306279	0.134489
ZHOU_INFLAMMATORY_RESPONSE_LIVE_UP	C2	238	0.310632	1.48621	0.00149254	0.134538
ZHOU_INFLAMMATORY_RESPONSE_LPS_UP	C2	215	0.313458	1.47439	0.00311526	0.141134
CHARAFE_BREAST_CANCER_LUMINAL_VS_MESENCHYMAL_UP	C2	216	0.309653	1.4739	0.00601504	0.140999
NABA_MATRISOME_ASSOCIATED	C2	366	0.288568	1.46152	0.00144509	0.147256
NABA_SECRETED_FACTORS	C2	168	0.319166	1.46117	0.00476191	0.146969
LEE_BMP2_TARGETS_DN	C2	487	0.283407	1.45161	0	0.153381
FULCHER_INFLAMMATORY_RESPONSE_LECTIN_VS_LPS_UP	C2	290	0.287697	1.43839	0.00286944	0.165055
MOOTHA_PGC	C2	240	0.29793	1.43201	0.00293255	0.169836
BOCHKIS_FOXA2_TARGETS	C2	252	0.292511	1.41795	0.00605144	0.181445
NUYTTEN_NIPP1_TARGETS_UP	C2	361	0.279403	1.4175	0.00289855	0.181608
SMID_BREAST_CANCER_BASAL_UP	C2	363	0.279043	1.39652	0	0.197598
SENESE_HDAC3_TARGETS_UP	C2	315	0.280894	1.3903	0.00849858	0.204763
CHEMNITZ_RESPONSE_TO_PROSTAGLANDIN_E2_DN	C2	213	0.291349	1.37067	0.00768049	0.218919
FORTSCHEGGER_PHF8_TARGETS_DN	C2	401	0.268737	1.36755	0.00284495	0.220895
CHEMOKINE_RECEPTOR_BINDING	C5	23	0.644809	2.01736	0	0.0598923
G_PROTEIN_COUPLED_RECEPTOR_BINDING	C5	28	0.596585	1.97334	0	0.0492906
CHEMOKINE_ACTIVITY	C5	22	0.620082	1.92008	0.00177305	0.0744151
INFLAMMATORY_RESPONSE	C5	84	0.460628	1.89488	0	0.0758557
GTPASE_BINDING	C5	19	0.62317	1.89043	0.00180505	0.0635077
SMALL_GTPASE_BINDING	C5	19	0.62317	1.86285	0.00352113	0.0745496
PROTEIN_FOLDING	C5	24	0.593026	1.85683	0.00183486	0.0687629
RESPONSE_TO_WOUNDING	C5	124	0.417206	1.83859	0	0.0747079
POSITIVE_REGULATION_OF_TRANSLATION	C5	24	0.571471	1.77652	0.00346021	0.127343
CYTOKINE_ACTIVITY	C5	62	0.458744	1.77334	0	0.117899
RAS_GTPASE_BINDING	C5	15	0.622433	1.74507	0.00905797	0.142454
VESICULAR_FRACTION	C5	22	0.554241	1.72381	0.00364299	0.160596
NUCLEAR_ENVELOPE_ENDOPLASMIC_RETICULUM_NETWORK	C5	52	0.441202	1.68296	0.00178253	0.218452
LOCOMOTORY_BEHAVIOR	C5	59	0.427491	1.66745	0.00171527	0.235767
POSITIVE_REGULATION_OF_CYTOKINE_BIOSYNTHETIC_PROCESS	C5	18	0.569793	1.65412	0.00957854	0.245262
EXTRACELLULAR_SPACE	C5	133	0.371846	1.65116	0	0.236682
RESPONSE_TO_EXTERNAL_STIMULUS	C5	200	0.348953	1.64885	0	0.227898
DEFENSE_RESPONSE	C5	155	0.350289	1.60936	0	0.235581
RESPONSE_TO_STRESS	C5	304	0.323833	1.59625	0	0.240977
GSE13485_CTRL_VS_DAY7_YF17D_VACCINE_PBMC_DN	C7	105	0.595439	2.56106	0	0
GSE13485_DAY3_VS_DAY7_YF17D_VACCINE_PBMC_DN	C7	96	0.568067	2.43297	0	0
GSE10325_MYELOID_VS_LUPUS_MYELOID_DN	C7	118	0.538939	2.3411	0	0
GSE18791_CTRL_VS_NEWCASTLE_VIRUS_DC_8H_DN	C7	106	0.5341	2.30541	0	0
GSE24634_IL4_VS_CTRL_TREATED_NAIVE_CD4_TCELL_DAY10_DN	C7	106	0.532843	2.27755	0	0
GSE13485_DAY1_VS_DAY7_YF17D_VACCINE_PBMC_DN	C7	98	0.531765	2.26466	0	0
GSE20715_0H_VS_48H_OZONE_LUNG_DN	C7	120	0.513014	2.25176	0	0
GSE18791_CTRL_VS_NEWCASTLE_VIRUS_DC_10H_DN	C7	105	0.523058	2.23402	0	0
GSE1432_CTRL_VS_IFNG_6H_MICROGLIA_DN	C7	101	0.524754	2.22324	0	0
GSE34205_HEALTHY_VS_FLU_INF_INFANT_PBMC_DN	C7	90	0.52826	2.20154	0	0
GSE18791_UNSTIM_VS_NEWCATSLE_VIRUS_DC_6H_DN	C7	88	0.522864	2.19636	0	0
GSE20715_0H_VS_48H_OZONE_TLR4_KO_LUNG_DN	C7	124	0.498955	2.18905	0	0
GSE14000_UNSTIM_VS_4H_LPS_DC_TRANSLATED_RNA_DN	C7	106	0.5066	2.18127	0	0
GSE22886_CTRL_VS_LPS_24H_DC_DN	C7	104	0.502199	2.16064	0	7.7505e-05
GSE13484_UNSTIM_VS_YF17D_VACCINE_STIM_PBMC_DN	C7	112	0.498951	2.15868	0	7.2338e-05
GSE13485_PRE_VS_POST_YF17D_VACCINATION_PBMC_DN	C7	107	0.489221	2.12836	0	0.000135108
GSE18791_UNSTIM_VS_NEWCATSLE_VIRUS_DC_10H_DN	C7	97	0.506756	2.12685	0	0.00012716
GSE2706_R848_VS_R848_AND_LPS_2H_STIM_DC_DN	C7	106	0.490003	2.12542	0	0.000179349
GSE2706_UNSTIM_VS_2H_LPS_AND_R848_DC_DN	C7	108	0.494206	2.1158	0	0.000169909
GSE1432_CTRL_VS_IFNG_24H_MICROGLIA_DN	C7	103	0.486365	2.09343	0	0.000161414
GSE20715_0H_VS_24H_OZONE_TLR4_KO_LUNG_DN	C7	136	0.465804	2.07708	0	0.000153728
GSE9988_LOW_LPS_VS_CTRL_TREATED_MONOCYTE_UP	C7	111	0.48081	2.06731	0	0.00014674
GSE24634_IL4_VS_CTRL_TREATED_NAIVE_CD4_TCELL_DAY3_DN	C7	115	0.474013	2.05898	0	0.00014036
GSE2706_UNSTIM_VS_2H_LPS_DC_DN	C7	113	0.469202	2.05613	0	0.000134512
GSE10325_BCELL_VS_LUPUS_BCELL_DN	C7	112	0.477595	2.05006	0	0.000129131
GSE18791_CTRL_VS_NEWCASTLE_VIRUS_DC_4H_DN	C7	97	0.477178	2.04631	0	0.000124165
GSE24634_IL4_VS_CTRL_TREATED_NAIVE_CD4_TCELL_DAY7_DN	C7	113	0.471257	2.04542	0	0.000119566
GSE10325_BCELL_VS_MYELOID_DN	C7	108	0.473687	2.04502	0	0.000115296
GSE360_HIGH_DOSE_B_MALAYI_VS_M_TUBERCULOSIS_DC_DN	C7	127	0.460445	2.01272	0	0.00025973
GSE16755_CTRL_VS_IFNA_TREATED_MAC_DN	C7	112	0.46214	2.00887	0	0.000251073
GSE13485_CTRL_VS_DAY3_YF17D_VACCINE_PBMC_DN	C7	99	0.474388	2.00511	0	0.000242973
GSE9006_TYPE_1_DIABETES_AT_DX_VS_4MONTH_POST_DX_PBMC_UP	C7	115	0.458945	2.00227	0	0.00023538
GSE20715_0H_VS_24H_OZONE_LUNG_DN	C7	111	0.471292	2.0022	0	0.000228248
GSE22886_DAY0_VS_DAY1_MONOCYTE_IN_CULTURE_DN	C7	116	0.453586	1.992	0	0.000346198
GSE1432_1H_VS_6H_IFNG_MICROGLIA_DN	C7	113	0.458877	1.99026	0	0.000336307
GSE6269_HEALTHY_VS_STREP_AUREUS_INF_PBMC_DN	C7	106	0.457778	1.97751	0	0.00044562
GSE14000_UNSTIM_VS_4H_LPS_DC_DN	C7	108	0.451492	1.97486	0	0.000433576
GSE360_L_DONOVANI_VS_M_TUBERCULOSIS_DC_DN	C7	119	0.444092	1.96602	0	0.000533829
GSE10325_CD4_TCELL_VS_LUPUS_CD4_TCELL_DN	C7	109	0.458665	1.9649	0	0.000520141
GSE9988_LOW_LPS_VS_VEHICLE_TREATED_MONOCYTE_UP	C7	104	0.456687	1.95798	0	0.000533778
GSE9006_HEALTHY_VS_TYPE_1_DIABETES_PBMC_AT_DX_DN	C7	104	0.447507	1.93848	0	0.000652266
GSE9988_LPS_VS_CTRL_TREATED_MONOCYTE_UP	C7	111	0.44553	1.9359	0	0.00068755
GSE9988_ANTI_TREM1_VS_LOW_LPS_MONOCYTE_DN	C7	118	0.439375	1.92454	0	0.000796888
GSE7460_CTRL_VS_TGFB_TREATED_ACT_FOXP3_HET_TCONV_UP	C7	120	0.439562	1.92272	0	0.00080273
GSE9988_ANTI_TREM1_VS_ANTI_TREM1_AND_LPS_MONOCYTE_DN	C7	115	0.436092	1.9064	0	0.00104641
GSE360_DC_VS_MAC_M_TUBERCULOSIS_UP	C7	121	0.435424	1.90384	0	0.00109296
GSE2706_UNSTIM_VS_2H_R848_DC_DN	C7	101	0.442916	1.894	0	0.00120652
GSE14769_UNSTIM_VS_40MIN_LPS_BMDM_DN	C7	114	0.432604	1.89358	0	0.00118138
GSE9988_ANTI_TREM1_VS_LPS_MONOCYTE_DN	C7	117	0.436656	1.884	0	0.00135557
GSE9988_ANTI_TREM1_AND_LPS_VS_CTRL_TREATED_MONOCYTES_UP	C7	112	0.4347	1.87624	0	0.00150033
GSE9988_LPS_VS_VEHICLE_TREATED_MONOCYTE_UP	C7	109	0.427905	1.86799	0	0.00170307
GSE2706_UNSTIM_VS_8H_R848_DC_DN	C7	109	0.431174	1.86481	0	0.00175377
GSE14769_UNSTIM_VS_120MIN_LPS_BMDM_DN	C7	125	0.428701	1.86021	0	0.00178111
GSE1432_1H_VS_24H_IFNG_MICROGLIA_DN	C7	101	0.433417	1.8579	0	0.00178758
GSE22886_NAIVE_CD8_TCELL_VS_NEUTROPHIL_DN	C7	111	0.426604	1.84874	0	0.00208782
GSE14769_UNSTIM_VS_80MIN_LPS_BMDM_DN	C7	120	0.4227	1.84454	0	0.00222218
GSE6269_FLU_VS_STREP_PNEUMO_INF_PBMC_UP	C7	94	0.440675	1.84409	0	0.00218319
GSE1460_INTRATHYMIC_T_PROGENITOR_VS_THYMIC_STROMAL_CELL_DN	C7	106	0.420906	1.83857	0	0.00229302
GSE14000_UNSTIM_VS_16H_LPS_DC_TRANSLATED_RNA_DN	C7	108	0.430786	1.83851	0	0.00225415
GSE360_LOW_DOSE_B_MALAYI_VS_M_TUBERCULOSIS_DC_DN	C7	113	0.423454	1.83056	0	0.00244862
GSE24634_IL4_VS_CTRL_TREATED_NAIVE_CD4_TCELL_DAY5_DN	C7	97	0.42644	1.81457	0	0.00309392
GSE360_CTRL_VS_M_TUBERCULOSIS_DC_DN	C7	122	0.405433	1.81134	0	0.00326764
GSE29618_MONOCYTE_VS_PDC_UP	C7	132	0.399032	1.78593	0	0.0049182
GSE18791_CTRL_VS_NEWCASTLE_VIRUS_DC_12H_DN	C7	92	0.417763	1.76847	0	0.00628036
GSE18791_CTRL_VS_NEWCASTLE_VIRUS_DC_6H_DN	C7	111	0.407576	1.76817	0	0.00618374
GSE32423_CTRL_VS_IL4_MEMORY_CD8_TCELL_DN	C7	101	0.41174	1.76332	0	0.00655897
GSE6269_HEALTHY_VS_FLU_INF_PBMC_DN	C7	85	0.427916	1.76263	0.00164745	0.00650949
GSE22886_NAIVE_CD4_TCELL_VS_MONOCYTE_DN	C7	123	0.397854	1.75502	0	0.00707836
GSE22886_NAIVE_BCELL_VS_MONOCYTE_DN	C7	110	0.406266	1.75458	0	0.00706941
GSE14000_UNSTIM_VS_16H_LPS_DC_DN	C7	105	0.405667	1.74594	0	0.00790174
GSE24634_TEFF_VS_TCONV_DAY7_IN_CULTURE_DN	C7	121	0.399964	1.74383	0	0.00807764
GSE360_L_DONOVANI_VS_M_TUBERCULOSIS_MAC_DN	C7	126	0.390182	1.73831	0	0.00853319
GSE13485_DAY7_VS_DAY21_YF17D_VACCINE_PBMC_UP	C7	112	0.402024	1.73721	0	0.00857767
GSE17721_POLYIC_VS_PAM3CSK4_1H_BMDM_DN	C7	120	0.395652	1.73416	0	0.00896696
GSE29618_MONOCYTE_VS_PDC_DAY7_FLU_VACCINE_UP	C7	131	0.390218	1.72617	0.00154083	0.010005
GSE10325_LUPUS_CD4_TCELL_VS_LUPUS_MYELOID_DN	C7	112	0.3967	1.71629	0	0.0114232
GSE9988_ANTI_TREM1_VS_CTRL_TREATED_MONOCYTES_UP	C7	120	0.39062	1.71397	0	0.011579
GSE17721_LPS_VS_PAM3CSK4_2H_BMDM_UP	C7	120	0.389326	1.70885	0	0.0122968
GSE3982_CTRL_VS_LPS_48H_DC_DN	C7	114	0.390795	1.70153	0	0.0136631
GSE17721_0.5H_VS_8H_CPG_BMDM_DN	C7	98	0.400907	1.70084	0	0.013573
GSE32423_CTRL_VS_IL7_IL4_MEMORY_CD8_TCELL_DN	C7	90	0.404762	1.69955	0.00509338	0.0135907
GSE17721_CTRL_VS_CPG_24H_BMDM_DN	C7	102	0.4011	1.68909	0.00160256	0.0154138
GSE8515_CTRL_VS_IL1_4H_STIM_MAC_DN	C7	105	0.389604	1.68834	0	0.0153707
GSE32423_MEMORY_VS_NAIVE_CD8_TCELL_UP	C7	81	0.41165	1.68636	0	0.0155599
GSE3982_MAC_VS_NKCELL_UP	C7	121	0.385505	1.68453	0.0016	0.0158568
GSE34205_RSV_VS_FLU_INF_INFANT_PBMC_DN	C7	99	0.388802	1.68032	0	0.0165698
GSE11057_NAIVE_CD4_VS_PBMC_CD4_TCELL_DN	C7	118	0.385213	1.67498	0.00155039	0.0175101
GSE17721_LPS_VS_CPG_2H_BMDM_UP	C7	106	0.389578	1.67338	0	0.0176503
GSE18791_CTRL_VS_NEWCASTLE_VIRUS_DC_16H_DN	C7	96	0.39331	1.66617	0	0.0194717
GSE13485_DAY3_VS_DAY21_YF17D_VACCINE_PBMC_UP	C7	109	0.385614	1.66546	0	0.0194334
GSE29618_BCELL_VS_MONOCYTE_DN	C7	119	0.380192	1.66212	0	0.0202219
GSE6269_FLU_VS_E_COLI_INF_PBMC_UP	C7	92	0.398266	1.66019	0	0.0205859
GSE18791_CTRL_VS_NEWCASTLE_VIRUS_DC_2H_DN	C7	83	0.402483	1.65804	0.00496689	0.0207918
GSE360_L_DONOVANI_VS_B_MALAYI_HIGH_DOSE_DC_UP	C7	113	0.381198	1.65727	0	0.0208003
GSE22886_NAIVE_CD8_TCELL_VS_MONOCYTE_DN	C7	121	0.371969	1.65548	0.00163666	0.0209642
GSE9988_ANTI_TREM1_VS_VEHICLE_TREATED_MONOCYTES_UP	C7	115	0.385866	1.65372	0.00163934	0.0213496
GSE360_L_MAJOR_VS_B_MALAYI_HIGH_DOSE_MAC_UP	C7	121	0.379956	1.65304	0	0.0212945
GSE17721_LPS_VS_PAM3CSK4_1H_BMDM_DN	C7	115	0.379724	1.65142	0.00157233	0.0216118
GSE22886_NAIVE_BCELL_VS_NEUTROPHIL_DN	C7	104	0.389133	1.65018	0.00310559	0.0217498
GSE8384_CTRL_VS_B_ABORTUS_4H_MAC_CELL_LINE_DN	C7	113	0.377145	1.65006	0.00166667	0.021564
GSE360_T_GONDII_VS_M_TUBERCULOSIS_DC_DN	C7	118	0.379005	1.64688	0.0016129	0.0224656
GSE22886_NAIVE_TCELL_VS_MONOCYTE_DN	C7	119	0.379621	1.64659	0.0016835	0.0223503
GSE17580_UNINFECTED_VS_S_MANSONI_INF_TREG_DN	C7	105	0.382686	1.64341	0.00475436	0.0232451
GSE360_DC_VS_MAC_DN	C7	99	0.383347	1.64217	0.00165563	0.0234333
GSE2706_UNSTIM_VS_8H_LPS_AND_R848_DC_DN	C7	119	0.376872	1.64186	0.00160772	0.023342
GSE14769_UNSTIM_VS_60MIN_LPS_BMDM_DN	C7	122	0.376023	1.64014	0	0.0236076
GSE24102_GRANULOCYSTIC_MDSC_VS_NEUTROPHIL_DN	C7	102	0.382529	1.63976	0.00169779	0.0235376
GSE36392_TYPE_2_MYELOID_VS_NEUTROPHIL_IL25_TREATED_LUNG_DN	C7	102	0.385138	1.63808	0.00318979	0.0238654
GSE13485_DAY1_VS_DAY3_YF17D_VACCINE_PBMC_DN	C7	105	0.383933	1.637	0.00161031	0.0239824
GSE1460_NAIVE_CD4_TCELL_ADULT_BLOOD_VS_THYMIC_STROMAL_CELL_DN	C7	115	0.373889	1.63678	0	0.0238521
GSE20715_0H_VS_6H_OZONE_LUNG_DN	C7	115	0.374195	1.63163	0	0.0253686
GSE29618_PDC_VS_MDC_DAY7_FLU_VACCINE_DN	C7	111	0.374412	1.63078	0.00168919	0.0254109
GSE8515_IL1_VS_IL6_4H_STIM_)MAC_UP	C7	116	0.375345	1.62831	0.00336134	0.0259731
GSE10325_CD4_TCELL_VS_MYELOID_DN	C7	114	0.378125	1.62179	0.00165289	0.0279633
GSE6269_E_COLI_VS_STREP_PNEUMO_INF_PBMC_DN	C7	97	0.384216	1.61667	0.0034188	0.0297826
GSE17721_CPG_VS_GARDIQUIMOD_6H_BMDM_DN	C7	111	0.371902	1.61503	0.00172712	0.0301075
GSE17721_CTRL_VS_PAM3CSK4_8H_BMDM_DN	C7	108	0.37736	1.61477	0.00498339	0.0299603
GSE29617_CTRL_VS_DAY7_TIV_FLU_VACCINE_PBMC_2008_UP	C7	115	0.373169	1.61162	0.00165563	0.0307806
GSE17721_12H_VS_24H_PAM3CSK4_BMDM_UP	C7	100	0.381335	1.61069	0.00654665	0.0308451
GSE2826_WT_VS_BTK_KO_BCELL_DN	C7	123	0.365046	1.60764	0	0.0317854
GSE360_L_MAJOR_VS_M_TUBERCULOSIS_DC_DN	C7	107	0.376429	1.60085	0.00501672	0.0339222
GSE15930_STIM_VS_STIM_AND_IFNAB_48H_CD8_T_CELL_DN	C7	110	0.370279	1.59939	0.00163399	0.0342441
GSE29618_BCELL_VS_MDC_DAY7_FLU_VACCINE_DN	C7	116	0.367609	1.59913	0.00165837	0.0340618
GSE3337_4H_VS_16H_IFNG_IN_CD8POS_DC_UP	C7	101	0.376281	1.5977	0.00161031	0.0344771
GSE9037_CTRL_VS_LPS_4H_STIM_IRAK4_KO_BMDM_DN	C7	117	0.363001	1.59639	0.00162866	0.034691
GSE17721_CTRL_VS_GARDIQUIMOD_12H_BMDM_DN	C7	106	0.370433	1.59098	0.00647249	0.0368892
GSE18791_UNSTIM_VS_NEWCATSLE_VIRUS_DC_18H_DN	C7	88	0.378838	1.58665	0.00857633	0.0384991
GSE17974_2H_VS_72H_UNTREATED_IN_VITRO_CD4_TCELL_UP	C7	102	0.373267	1.58309	0.00486224	0.0398648
GSE360_L_DONOVANI_VS_B_MALAYI_HIGH_DOSE_MAC_UP	C7	120	0.362285	1.58037	0.00159236	0.0408698
GSE17721_CPG_VS_GARDIQUIMOD_24H_BMDM_UP	C7	111	0.363257	1.57918	0.00483092	0.0412242
GSE17721_PAM3CSK4_VS_CPG_24H_BMDM_DN	C7	115	0.361592	1.57846	0.00474683	0.0413105
GSE9988_ANTI_TREM1_AND_LPS_VS_VEHICLE_TREATED_MONOCYTES_UP	C7	108	0.369522	1.57784	0.00323102	0.0413963
GSE15930_NAIVE_VS_24H_IN_VITRO_STIM_INFAB_CD8_TCELL_DN	C7	89	0.380001	1.57738	0.0033389	0.040987
GSE3982_EOSINOPHIL_VS_MAC_DN	C7	111	0.364271	1.57694	0.00164745	0.0408662
GSE3982_MAC_VS_BCELL_UP	C7	109	0.365942	1.57606	0.0049505	0.0410084
GSE36392_MAC_VS_NEUTROPHIL_IL25_TREATED_LUNG_DN	C7	109	0.368254	1.57604	0	0.0407091
GSE1432_CTRL_VS_IFNG_1H_MICROGLIA_DN	C7	110	0.361187	1.57451	0.00157233	0.0411212
GSE10325_LUPUS_BCELL_VS_LUPUS_MYELOID_DN	C7	115	0.357601	1.56847	0.00160772	0.0438073
GSE13738_RESTING_VS_BYSTANDER_ACTIVATED_CD4_TCELL_DN	C7	115	0.363103	1.5664	0.00625978	0.0443879
GSE15930_STIM_VS_STIM_AND_TRICHOSTATINA_72H_CD8_T_CELL_DN	C7	100	0.364747	1.56288	0.00526316	0.0458253
GSE3982_DC_VS_NKCELL_UP	C7	112	0.361061	1.56234	0.00483092	0.0457225
GSE29617_CTRL_VS_TIV_FLU_VACCINE_PBMC_2008_UP	C7	97	0.362515	1.56064	0.00327869	0.0464248
GSE22886_DAY1_VS_DAY7_MONOCYTE_IN_CULTURE_UP	C7	116	0.357121	1.55867	0	0.0471673
GSE11864_CSF1_VS_CSF1_IFNG_PAM3CYS_IN_MAC_DN	C7	98	0.368561	1.55779	0.00651466	0.046993
GSE2197_IMMUNOSUPPRESSIVE_DNA_VS_UNTREATED_IN_DC_UP	C7	109	0.35871	1.5512	0.00665557	0.0503647
GSE17721_PAM3CSK4_VS_GADIQUIMOD_0.5H_BMDM_UP	C7	110	0.356982	1.54426	0.00814332	0.0541772
GSE13306_RA_VS_UNTREATED_MEM_CD4_TCELL_DN	C7	107	0.361088	1.54297	0.00638978	0.0546377
GSE17974_0.5H_VS_72H_UNTREATED_IN_VITRO_CD4_TCELL_UP	C7	100	0.362027	1.53732	0.00340136	0.0579492
GSE37416_CTRL_VS_12H_F_TULARENSIS_LVS_NEUTROPHIL_DN	C7	100	0.358374	1.53539	0.0096463	0.0587953
GSE15930_STIM_VS_STIM_AND_TRICHOSTATINA_48H_CD8_T_CELL_DN	C7	101	0.359479	1.53345	0.00485437	0.0597981
GSE17721_POLYIC_VS_GARDIQUIMOD_4H_BMDM_DN	C7	105	0.358285	1.53286	0.00693241	0.059828
GOLDRATH_NAIVE_VS_MEMORY_CD8_TCELL_DN	C7	126	0.350822	1.53159	0.00344234	0.0602531
GSE1432_CTRL_VS_IFNG_1H_MICROGLIA_UP	C7	92	0.362193	1.52783	0	0.0615178
GSE22886_NAIVE_CD4_TCELL_VS_12H_ACT_TH1_DN	C7	104	0.353154	1.52532	0.00463679	0.0630803
GSE17721_LPS_VS_POLYIC_8H_BMDM_UP	C7	114	0.350366	1.52198	0.00810373	0.0651979
GSE17721_12H_VS_24H_GARDIQUIMOD_BMDM_UP	C7	103	0.357765	1.5214	0.00498339	0.0652316
GSE17721_ALL_VS_24H_PAM3CSK4_BMDM_UP	C7	104	0.353403	1.51598	0.00636943	0.0684904
GSE36392_TYPE_2_MYELOID_VS_EOSINOPHIL_IL25_TREATED_LUNG_DN	C7	104	0.354994	1.51524	0.00625	0.0688241
GSE3982_CTRL_VS_LPS_4H_MAC_DN	C7	133	0.341296	1.51503	0.00643087	0.0686285
GSE17721_POLYIC_VS_GARDIQUIMOD_12H_BMDM_DN	C7	101	0.358182	1.51501	0.00328947	0.0682474
GSE360_T_GONDII_VS_M_TUBERCULOSIS_MAC_DN	C7	119	0.342679	1.51091	0.00803858	0.0705859
GSE3982_EOSINOPHIL_VS_NKCELL_UP	C7	111	0.35213	1.50887	0.00686106	0.0717359
GSE36476_CTRL_VS_TSST_ACT_16H_MEMORY_CD4_TCELL_YOUNG_DN	C7	97	0.358169	1.50722	0.00650406	0.0726766
GSE7852_LN_VS_FAT_TREG_DN	C7	117	0.343035	1.50618	0.00823723	0.0730547
GSE14000_4H_VS_16H_LPS_DC_UP	C7	97	0.354289	1.50468	0.00650406	0.0740017
GSE3982_DC_VS_BASOPHIL_UP	C7	104	0.348511	1.49919	0.00860585	0.0774509
GSE27786_LSK_VS_NKCELL_DN	C7	94	0.35345	1.49426	0.00671141	0.0808997
GSE13484_3H_UNSTIM_VS_YF17D_VACCINE_STIM_PBMC_DN	C7	111	0.346683	1.49397	0.00615385	0.0806977
GSE22886_TH1_VS_TH2_48H_ACT_UP	C7	103	0.349753	1.49274	0.00974026	0.0812632
GSE24634_TREG_VS_TCONV_POST_DAY7_IL4_CONVERSION_DN	C7	123	0.340248	1.491	0.00809062	0.0813697
GSE24634_TEFF_VS_TCONV_DAY3_IN_CULTURE_DN	C7	105	0.345834	1.48772	0.00977199	0.0837602
GSE17721_POLYIC_VS_PAM3CSK4_0.5H_BMDM_DN	C7	111	0.339727	1.48617	0.00809062	0.0841089
GSE17974_0H_VS_1H_IN_VITRO_ACT_CD4_TCELL_DN	C7	87	0.353803	1.48422	0.00661157	0.085345
GSE11864_UNTREATED_VS_CSF1_PAM3CYS_IN_MAC_DN	C7	95	0.350361	1.48275	0.00853242	0.086307
GSE7460_CTRL_VS_TGFB_TREATED_ACT_TREG_UP	C7	109	0.34329	1.47616	0.0096	0.0909351
GSE20366_EX_VIVO_VS_DEC205_CONVERSION_NAIVE_CD4_TCELL_UP	C7	111	0.336074	1.47292	0.00953895	0.0924784
GSE17721_PAM3CSK4_VS_GADIQUIMOD_6H_BMDM_UP	C7	102	0.336806	1.47127	0.00805153	0.0937534
GSE29618_MONOCYTE_VS_MDC_UP	C7	128	0.328614	1.46636	0.00947867	0.0970227
GSE339_EX_VIVO_VS_IN_CULTURE_CD8POS_DC_DN	C7	121	0.336315	1.4657	0.00961539	0.0967789
GSE360_L_MAJOR_VS_B_MALAYI_LOW_DOSE_DC_UP	C7	118	0.333188	1.46171	0.00966184	0.0992728
GSE17721_0.5H_VS_24H_CPG_BMDM_DN	C7	118	0.326881	1.44392	0.00955414	0.111783
GSE24634_TREG_VS_TCONV_POST_DAY10_IL4_CONVERSION_DN	C7	126	0.324216	1.43071	0.00661157	0.120518

## Sheet: RES
NAME	MSigDB Set	SIZE	Enrichment Score	Normalized Enrichment Score	Nominal P value	FDR q-value
HALLMARK_SPERMATOGENESIS	C1	77	-0.352317	-1.5247	0.00746269	0.22215
KEGG_RIBOSOME	C2	60	-0.613786	-2.56573	0	0
BILANGES_SERUM_AND_RAPAMYCIN_SENSITIVE_GENES	C2	36	-0.702205	-2.55275	0	0
REACTOME_PEPTIDE_CHAIN_ELONGATION	C2	59	-0.614268	-2.5063	0	0
REACTOME_SRP_DEPENDENT_COTRANSLATIONAL_PROTEIN_TARGETING_TO_MEMBRANE	C2	69	-0.577659	-2.42776	0	0
REACTOME_3_UTR_MEDIATED_TRANSLATIONAL_REGULATION	C2	69	-0.567068	-2.3862	0	0
REACTOME_INFLUENZA_VIRAL_RNA_TRANSCRIPTION_AND_REPLICATION	C2	65	-0.551919	-2.31543	0	0.000326838
REACTOME_NONSENSE_MEDIATED_DECAY_ENHANCED_BY_THE_EXON_JUNCTION_COMPLEX	C2	76	-0.536692	-2.30912	0	0.000559252
ZHAN_MULTIPLE_MYELOMA_CD2_UP	C2	26	-0.675368	-2.30759	0	0.000489346
REACTOME_TRANSLATION	C2	92	-0.512153	-2.28644	0	0.000649822
CHNG_MULTIPLE_MYELOMA_HYPERPLOID_UP	C2	28	-0.659604	-2.26759	0	0.000778907
HOLLEMAN_ASPARAGINASE_RESISTANCE_B_ALL_UP	C2	17	-0.71382	-2.1881	0	0.00194832
IRITANI_MAD1_TARGETS_DN	C2	24	-0.631779	-2.10197	0	0.00655715
WONG_ENDMETRIUM_CANCER_DN	C2	51	-0.523533	-2.08962	0	0.00747504
REACTOME_RESPIRATORY_ELECTRON_TRANSPORT	C2	35	-0.5491	-2.0389	0.00240964	0.0138677
ABE_INNER_EAR	C2	27	-0.580017	-2.0288	0	0.0148202
REACTOME_FORMATION_OF_THE_TERNARY_COMPLEX_AND_SUBSEQUENTLY_THE_43S_COMPLEX	C2	31	-0.569845	-2.01516	0	0.0170532
FLOTHO_PEDIATRIC_ALL_THERAPY_RESPONSE_UP	C2	34	-0.553794	-1.98923	0	0.0219288
YAMASHITA_LIVER_CANCER_WITH_EPCAM_UP	C2	36	-0.53184	-1.98515	0	0.0217883
GENTILE_UV_LOW_DOSE_DN	C2	46	-0.520493	-1.97265	0	0.0246361
LIEN_BREAST_CARCINOMA_METAPLASTIC	C2	24	-0.59999	-1.96502	0.00461894	0.0251885
BONOME_OVARIAN_CANCER_POOR_SURVIVAL_UP	C2	22	-0.599121	-1.93892	0.00217865	0.0329182
REACTOME_INFLUENZA_LIFE_CYCLE	C2	91	-0.431788	-1.93818	0	0.0318627
DUNNE_TARGETS_OF_AML1_MTG8_FUSION_UP	C2	24	-0.572634	-1.92676	0	0.0342651
PEDERSEN_METASTASIS_BY_ERBB2_ISOFORM_6	C2	18	-0.619578	-1.91451	0	0.0376873
JISON_SICKLE_CELL_DISEASE_DN	C2	112	-0.416114	-1.91261	0	0.0370388
NIELSEN_GIST_AND_SYNOVIAL_SARCOMA_UP	C2	15	-0.657412	-1.90872	0	0.0369999
LEE_DIFFERENTIATING_T_LYMPHOCYTE	C2	114	-0.414838	-1.90452	0	0.0371735
BERENJENO_TRANSFORMED_BY_RHOA_DN	C2	223	-0.371945	-1.89493	0	0.04033
BILANGES_SERUM_RESPONSE_TRANSLATION	C2	23	-0.571629	-1.89487	0	0.0390071
REACTOME_RESPIRATORY_ELECTRON_TRANSPORT_ATP_SYNTHESIS_BY_CHEMIOSMOTIC_COUPLING_AND_HEAT_PRODUCTION_BY_UNCOUPLING_PROTEINS_	C2	51	-0.476555	-1.8841	0	0.0428044
YAO_TEMPORAL_RESPONSE_TO_PROGESTERONE_CLUSTER_15	C2	27	-0.550641	-1.87562	0	0.0457548
REN_ALVEOLAR_RHABDOMYOSARCOMA_UP	C2	69	-0.436021	-1.85265	0	0.056303
PETROVA_ENDOTHELIUM_LYMPHATIC_VS_BLOOD_UP	C2	88	-0.420967	-1.84486	0	0.0593384
YAO_TEMPORAL_RESPONSE_TO_PROGESTERONE_CLUSTER_12	C2	48	-0.458445	-1.83784	0.00230947	0.062642
BOQUEST_STEM_CELL_UP	C2	164	-0.375784	-1.83784	0	0.0608522
LANDIS_ERBB2_BREAST_PRENEOPLASTIC_DN	C2	37	-0.499486	-1.83332	0	0.0615359
REACTOME_G2_M_CHECKPOINTS	C2	23	-0.551127	-1.83019	0.00660793	0.0617305
ZHENG_FOXP3_TARGETS_IN_T_LYMPHOCYTE_DN	C2	29	-0.520958	-1.82888	0.00232558	0.0609777
EHLERS_ANEUPLOIDY_UP	C2	26	-0.543006	-1.82784	0	0.0603561
WANG_NFKB_TARGETS	C2	16	-0.605623	-1.82476	0	0.0608798
LEE_LIVER_CANCER_MYC_UP	C2	29	-0.521286	-1.81002	0.00217865	0.0691037
ANASTASSIOU_CANCER_MESENCHYMAL_TRANSITION_SIGNATURE	C2	45	-0.466017	-1.80707	0.00242131	0.0695359
ZIRN_TRETINOIN_RESPONSE_WT1_UP	C2	15	-0.617612	-1.80633	0.00421053	0.0683937
NABA_CORE_MATRISOME	C2	144	-0.376008	-1.80255	0	0.0694394
RICKMAN_HEAD_AND_NECK_CANCER_F	C2	43	-0.46928	-1.79893	0.00220751	0.0702486
REACTOME_TCR_SIGNALING	C2	34	-0.495239	-1.79719	0.00674157	0.0697799
PUJANA_XPRSS_INT_NETWORK	C2	94	-0.402431	-1.79526	0	0.0697575
ACEVEDO_FGFR1_TARGETS_IN_PROSTATE_CANCER_MODEL_DN	C2	169	-0.363465	-1.79505	0	0.068404
REACTOME_NITRIC_OXIDE_STIMULATES_GUANYLATE_CYCLASE	C2	17	-0.594191	-1.79374	0.00697674	0.0677391
MARTINEZ_RESPONSE_TO_TRABECTEDIN	C2	39	-0.4837	-1.79134	0	0.067903
KEGG_PARKINSONS_DISEASE	C2	69	-0.421092	-1.78741	0	0.0695733
TURASHVILI_BREAST_LOBULAR_CARCINOMA_VS_LOBULAR_NORMAL_UP	C2	59	-0.443072	-1.78578	0	0.0692226
MOOTHA_FFA_OXYDATION	C2	15	-0.624197	-1.78004	0.0087146	0.0711958
MCMURRAY_TP53_HRAS_COOPERATION_RESPONSE_DN	C2	34	-0.493041	-1.77257	0.00627615	0.075156
REACTOME_ACTIVATION_OF_THE_MRNA_UPON_BINDING_OF_THE_CAP_BINDING_COMPLEX_AND_EIFS_AND_SUBSEQUENT_BINDING_TO_43S	C2	37	-0.483629	-1.76823	0.00231481	0.0769906
RICKMAN_TUMOR_DIFFERENTIATED_WELL_VS_POORLY_UP	C2	137	-0.366795	-1.76176	0	0.0783213
LINDGREN_BLADDER_CANCER_CLUSTER_2B	C2	215	-0.345362	-1.75812	0	0.079373
CHEMELLO_SOLEUS_VS_EDL_MYOFIBERS_UP	C2	24	-0.532311	-1.75369	0.00646552	0.0816448
ZHOU_CELL_CYCLE_GENES_IN_IR_RESPONSE_6HR	C2	37	-0.476701	-1.74982	0.00225734	0.0832706
MARKEY_RB1_ACUTE_LOF_DN	C2	144	-0.363631	-1.7485	0	0.0829532
PUJANA_BRCA2_PCC_NETWORK	C2	238	-0.337251	-1.73538	0	0.0906823
PAPASPYRIDONOS_UNSTABLE_ATEROSCLEROTIC_PLAQUE_DN	C2	30	-0.490657	-1.72763	0.00469484	0.0960294
KEGG_FATTY_ACID_METABOLISM	C2	25	-0.51778	-1.72665	0.00909091	0.0953592
TANG_SENESCENCE_TP53_TARGETS_DN	C2	32	-0.482169	-1.71124	0.00454545	0.106267
BILANGES_RAPAMYCIN_SENSITIVE_VIA_TSC1_AND_TSC2	C2	36	-0.467556	-1.71032	0.00236967	0.105501
ISSAEVA_MLL2_TARGETS	C2	36	-0.473893	-1.71019	0.00941176	0.104114
CROONQUIST_NRAS_SIGNALING_DN	C2	42	-0.448518	-1.70638	0	0.105847
VECCHI_GASTRIC_CANCER_EARLY_DN	C2	213	-0.336589	-1.70382	0	0.106682
SWEET_LUNG_CANCER_KRAS_DN	C2	274	-0.326713	-1.70055	0	0.108306
KEGG_VASCULAR_SMOOTH_MUSCLE_CONTRACTION	C2	68	-0.40787	-1.69909	0.00225734	0.108114
LEE_LIVER_CANCER_DENA_DN	C2	49	-0.430124	-1.69715	0.00239234	0.108285
RODRIGUES_THYROID_CARCINOMA_ANAPLASTIC_DN	C2	285	-0.322055	-1.69372	0	0.11014
SABATES_COLORECTAL_ADENOMA_DN	C2	167	-0.346899	-1.69071	0	0.111659
PLASARI_TGFB1_TARGETS_10HR_DN	C2	161	-0.347073	-1.68208	0	0.118585
ZHAN_MULTIPLE_MYELOMA_PR_UP	C2	27	-0.493695	-1.67958	0.00221239	0.119589
MAHAJAN_RESPONSE_TO_IL1A_DN	C2	43	-0.438428	-1.67795	0.00488998	0.119843
KEGG_OXIDATIVE_PHOSPHORYLATION	C2	70	-0.391086	-1.66497	0.00257732	0.124358
MISSIAGLIA_REGULATED_BY_METHYLATION_DN	C2	68	-0.392462	-1.66447	0.00242131	0.12333
KAUFFMANN_MELANOMA_RELAPSE_UP	C2	38	-0.444099	-1.65404	0.00454545	0.13091
WANG_LSD1_TARGETS_UP	C2	18	-0.541573	-1.64772	0.00867679	0.133116
RIZ_ERYTHROID_DIFFERENTIATION	C2	49	-0.419815	-1.64508	0.00726392	0.134162
BENPORATH_SUZ12_TARGETS	C2	486	-0.295164	-1.64404	0	0.134026
VECCHI_GASTRIC_CANCER_ADVANCED_VS_EARLY_UP	C2	113	-0.353652	-1.64257	0	0.134315
ONKEN_UVEAL_MELANOMA_DN	C2	305	-0.309048	-1.63258	0	0.139694
LANDIS_ERBB2_BREAST_TUMORS_324_DN	C2	99	-0.362187	-1.63074	0.00248139	0.140402
CROONQUIST_IL6_DEPRIVATION_DN	C2	56	-0.400049	-1.62793	0.00928074	0.141866
PAL_PRMT5_TARGETS_UP	C2	120	-0.346701	-1.62502	0.00543478	0.14225
PASQUALUCCI_LYMPHOMA_BY_GC_STAGE_DN	C2	93	-0.354414	-1.62272	0	0.14194
SCIBETTA_KDM5B_TARGETS_DN	C2	48	-0.417325	-1.62218	0.00738916	0.14128
WHITEFORD_PEDIATRIC_CANCER_MARKERS	C2	74	-0.373033	-1.62005	0	0.142382
PID_TCR_PATHWAY	C2	49	-0.40638	-1.61602	0.00493827	0.142514
NABA_ECM_GLYCOPROTEINS	C2	102	-0.359714	-1.61451	0.00260417	0.142893
BONOME_OVARIAN_CANCER_SURVIVAL_SUBOPTIMAL_DEBULKING	C2	285	-0.306936	-1.6065	0	0.14523
ONDER_CDH1_TARGETS_2_UP	C2	158	-0.327635	-1.6063	0	0.14417
WAMUNYOKOLI_OVARIAN_CANCER_LMP_DN	C2	112	-0.344821	-1.60452	0	0.143789
KUNINGER_IGF1_VS_PDGFB_TARGETS_UP	C2	55	-0.39461	-1.60378	0.00963855	0.142147
POMEROY_MEDULLOBLASTOMA_DESMOPLASIC_VS_CLASSIC_DN	C2	42	-0.428464	-1.6011	0.00454545	0.140454
LI_INDUCED_T_TO_NATURAL_KILLER_DN	C2	73	-0.371331	-1.59208	0	0.148229
BERTUCCI_MEDULLARY_VS_DUCTAL_BREAST_CANCER_DN	C2	81	-0.369274	-1.58996	0.002457	0.149657
RHEIN_ALL_GLUCOCORTICOID_THERAPY_DN	C2	209	-0.312845	-1.58456	0	0.153573
BENPORATH_EED_TARGETS	C2	482	-0.283818	-1.5845	0	0.152421
SCHUETZ_BREAST_CANCER_DUCTAL_INVASIVE_UP	C2	215	-0.313096	-1.58388	0	0.152067
BENPORATH_PRC2_TARGETS	C2	279	-0.300208	-1.58172	0	0.153352
BLUM_RESPONSE_TO_SALIRASIB_DN	C2	187	-0.317817	-1.5799	0	0.15421
BURTON_ADIPOGENESIS_6	C2	108	-0.338077	-1.57698	0.00268817	0.155139
KINSEY_TARGETS_OF_EWSR1_FLII_FUSION_DN	C2	187	-0.315822	-1.5745	0	0.155979
LEE_EARLY_T_LYMPHOCYTE_UP	C2	60	-0.386725	-1.57441	0.00506329	0.154941
DELYS_THYROID_CANCER_DN	C2	139	-0.326865	-1.57433	0	0.153874
CUI_TCF21_TARGETS_2_UP	C2	232	-0.303262	-1.55192	0	0.170469
GOZGIT_ESR1_TARGETS_UP	C2	82	-0.359713	-1.55169	0.00791557	0.169593
LE_EGR2_TARGETS_UP	C2	66	-0.363351	-1.54541	0.00733496	0.173885
KEGG_PRIMARY_IMMUNODEFICIENCY	C2	22	-0.482236	-1.54433	0.00849257	0.174061
XU_GH1_AUTOCRINE_TARGETS_DN	C2	86	-0.349439	-1.54383	0.00483092	0.173636
REACTOME_METABOLISM_OF_MRNA	C2	129	-0.32705	-1.53636	0.00552486	0.1797
HAHTOLA_MYCOSIS_FUNGOIDES_SKIN_UP	C2	106	-0.327079	-1.49726	0.00549451	0.197799
ZHENG_GLIOBLASTOMA_PLASTICITY_UP	C2	140	-0.308688	-1.49276	0.00507614	0.200834
HSIAO_HOUSEKEEPING_GENES	C2	247	-0.289871	-1.48769	0	0.204702
SMID_BREAST_CANCER_NORMAL_LIKE_UP	C2	268	-0.287092	-1.48655	0	0.205301
ZHENG_BOUND_BY_FOXP3	C2	319	-0.276712	-1.47328	0	0.213971
WEST_ADRENOCORTICAL_TUMOR_DN	C2	303	-0.277507	-1.46722	0.00294985	0.218372
FEVR_CTNNB1_TARGETS_DN	C2	316	-0.270051	-1.45554	0	0.22856
HADDAD_B_LYMPHOCYTE_PROGENITOR	C2	163	-0.292921	-1.44894	0.00271003	0.232172
LU_AGING_BRAIN_UP	C2	166	-0.29476	-1.43558	0	0.241149
IVANOVA_HEMATOPOIESIS_STEM_CELL	C2	146	-0.300641	-1.4322	0.00530504	0.243459
STRUCTURAL_CONSTITUENT_OF_RIBOSOME	C5	47	-0.579159	-2.25557	0	0.000975758
STRUCTURAL_MOLECULE_ACTIVITY	C5	139	-0.39159	-1.87186	0	0.203977
PROTEINACEOUS_EXTRACELLULAR_MATRIX	C5	55	-0.451586	-1.82061	0.00243309	0.223716
EXTRACELLULAR_MATRIX	C5	56	-0.442587	-1.78095	0	0.249597
INTEGRIN_BINDING	C5	17	-0.583979	-1.76863	0.00626305	0.222534
CARBOXYLESTERASE_ACTIVITY	C5	15	-0.602082	-1.74566	0.00662252	0.223464
TRANSLATIONAL_INITIATION	C5	22	-0.533821	-1.71234	0.00923787	0.231335
GSE6269_HEALTHY_VS_FLU_INF_PBMC_UP	C7	80	-0.471497	-2.07298	0	0.00271122
GSE20715_0H_VS_48H_OZONE_TLR4_KO_LUNG_UP	C7	110	-0.452642	-2.06757	0	0.00135561
GSE22886_NAIVE_TCELL_VS_DC_UP	C7	111	-0.421003	-1.94903	0	0.00472117
GSE3982_MAST_CELL_VS_DC_UP	C7	102	-0.426629	-1.90321	0	0.00752624
GSE1460_DP_VS_CD4_THYMOCYTE_UP	C7	95	-0.399017	-1.7828	0	0.0292642
GSE22886_IGM_MEMORY_BCELL_VS_BM_PLASMA_CELL_UP	C7	115	-0.38443	-1.77528	0	0.0279146
GSE22886_NAIVE_CD8_TCELL_VS_MONOCYTE_UP	C7	110	-0.388564	-1.74522	0	0.0362121
GSE34205_HEALTHY_VS_FLU_INF_INFANT_PBMC_UP	C7	85	-0.394366	-1.73182	0	0.0377676
GSE6269_E_COLI_VS_STREP_AUREUS_INF_PBMC_UP	C7	88	-0.385314	-1.71957	0	0.0402989
GSE24634_NAIVE_CD4_TCELL_VS_DAY5_IL4_CONV_TREG_UP	C7	102	-0.370431	-1.68941	0	0.0560849
GSE3982_DC_VS_BASOPHIL_DN	C7	104	-0.369187	-1.68048	0	0.0564748
GSE22886_NAIVE_BCELL_VS_NEUTROPHIL_UP	C7	110	-0.371457	-1.67988	0	0.0523544
GSE22886_NAIVE_CD4_TCELL_VS_MONOCYTE_UP	C7	115	-0.35733	-1.66997	0.00257732	0.0556167
GSE14000_TRANSLATED_RNA_VS_MRNA_DC_DN	C7	66	-0.39353	-1.66155	0.00692841	0.0573798
GSE1460_INTRATHYMIC_T_PROGENITOR_VS_CD4_THYMOCYTE_UP	C7	99	-0.355239	-1.62633	0.0025641	0.0825155
GSE29614_CTRL_VS_DAY7_TIV_FLU_VACCINE_PBMC_UP	C7	63	-0.388189	-1.59665	0.00493827	0.114296
GSE17721_POLYIC_VS_CPG_24H_BMDM_UP	C7	93	-0.358805	-1.59522	0.00255754	0.109705
GSE11864_CSF1_IFNG_VS_CSF1_IFNG_PAM3CYS_IN_MAC_UP	C7	95	-0.355699	-1.58784	0	0.114304
GSE20715_0H_VS_48H_OZONE_LUNG_UP	C7	110	-0.342422	-1.58618	0	0.109831
GSE20715_0H_VS_24H_OZONE_LUNG_UP	C7	108	-0.345438	-1.58497	0.00549451	0.106487
GSE13738_RESTING_VS_BYSTANDER_ACTIVATED_CD4_TCELL_UP	C7	95	-0.352167	-1.58037	0.00995025	0.106804
GSE22886_IGG_IGA_MEMORY_BCELL_VS_BM_PLASMA_CELL_UP	C7	115	-0.3389	-1.55356	0.00522193	0.13975
GSE22886_NAIVE_CD8_TCELL_VS_DC_UP	C7	98	-0.344847	-1.54762	0.00995025	0.142873
GSE12366_GC_BCELL_VS_PLASMA_CELL_UP	C7	100	-0.34749	-1.54561	0	0.140211
GSE360_CTRL_VS_L_MAJOR_DC_UP	C7	113	-0.335465	-1.54557	0.0074813	0.134709
GSE1460_CORD_VS_ADULT_BLOOD_NAIVE_CD4_TCELL_DN	C7	106	-0.333563	-1.53783	0.00244499	0.14165
GSE360_LOW_DOSE_B_MALAYI_VS_M_TUBERCULOSIS_DC_UP	C7	108	-0.334493	-1.53627	0.00550964	0.139035
GSE3982_MAC_VS_TH2_DN	C7	104	-0.332056	-1.51558	0.0025974	0.163051
GSE26928_NAIVE_VS_CXCR5_POS_CD4_TCELL_UP	C7	70	-0.357559	-1.5123	0.00980392	0.162581
GSE37416_CTRL_VS_12H_F_TULARENSIS_LVS_NEUTROPHIL_UP	C7	109	-0.330683	-1.51089	0.00475059	0.159424
GSE3982_MEMORY_CD4_TCELL_VS_TH1_UP	C7	114	-0.324977	-1.49987	0.00514139	0.174092
GSE13493_CD4INTCD8POS_VS_CD8POS_THYMOCYTE_UP	C7	109	-0.328837	-1.49186	0.0049505	0.184006
GSE27786_CD8_TCELL_VS_MONO_MAC_UP	C7	103	-0.332527	-1.49163	0.00731707	0.179066
GSE32423_CTRL_VS_IL7_IL4_MEMORY_CD8_TCELL_UP	C7	106	-0.320888	-1.48127	0.00265957	0.184348
GSE17721_CTRL_VS_LPS_4H_BMDM_UP	C7	104	-0.329563	-1.4785	0.00501253	0.184946
GSE11924_TH1_VS_TH17_CD4_TCELL_DN	C7	100	-0.324872	-1.47345	0.00263158	0.189372
GSE17721_CTRL_VS_PAM3CSK4_4H_BMDM_UP	C7	101	-0.326274	-1.47255	0.00771208	0.18637
GSE3982_EOSINOPHIL_VS_DC_UP	C7	99	-0.317335	-1.44902	0.00977995	0.231758
GSE22886_NAIVE_TCELL_VS_MONOCYTE_UP	C7	110	-0.311593	-1.44668	0.00833333	0.226287
GSE22886_DAY0_VS_DAY1_MONOCYTE_IN_CULTURE_UP	C7	114	-0.305562	-1.42826	0.00789474	0.249399
